# Supplementary material for: Bacterial surface display of metal binding peptides as whole-cell biocatalysts for 4-nitroaniline reduction
Source: Royal Society of Chemistry journal article supplement (doi:10.1039/c5ra18561k), 2015-01-01
Supplement: c5ra18561k1.pdf [file c5ra18561k1.pdf]

## **SUPPORTING INFORMATION**

### **Bacterial surface display of metal binding peptides as whole-cell biocatalysts for 4-nitroaniline reduction**

Dong-Yu Tsai, Yi-Jung Tsai, Chia-Ho Yen, Chun-Yu Ouyang, and Yi-Chun Yeh\*  
Department of Chemistry, National Taiwan Normal University

## **Materials and methods**

### **Bacterial strains, growth conditions, and cloning**

*R. eutropha* cells were cultured overnight at 30°C in lysogeny broth (LB) or H3 medium with shaking at 200 rpm. *E. coli* cells were incubated in lysogeny broth or M9 medium at 37°C (250 rpm). Strains, plasmids, primers, and construct details are listed in Table S1, S2 and S3.

### **Analysis of RFP localization by fluorescence microscopy**

For localization studies, the overnight *E. coli* culture was diluted in LB media for 3 h until the OD<sub>600</sub> reached 0.6. Then, 0.2% arabinose was used to induce expression of fluorescent protein fusions for 5 h. Similarly, *R. eutropha* strains were induced for 15 h with 0.2% arabinose. Cells were immobilized using a thin layer of 1% agarose in PBS medium. Phase contrast and fluorescence microscopy images were obtained using a Zeiss Axio A1 Microscope with an EC Plan-Neofluar 100x/1.30, and oil PH3 objective.

### **Synthesis of nanoparticles**

The gold nanoparticles were synthesized by citrate reduction of HAuCl<sub>4</sub>.<sup>1</sup> The HAuCl<sub>4</sub> solution (1.0 mM, 250 mL) was boiled, and added sodium citrate tribasic hydrate (38.8 mM, 25 mL) rapidly for 15 minutes until color change to deep red. The size of Au nanoparticles was determined by TEM analysis (JEOL JEM-1200 EXII). The absorption of Au nanoparticles solution was recorded by Multi-Mode Microplate Reader (BioTeK). The concentration of the Au nanoparticles was determined using an extinction coefficient of ca.  $2.0 \times 10^8 \text{ M}^{-1}\text{cm}^{-1}$  at 520 nm from Beer's law.<sup>2</sup>

### **Analysis of binding affinity of various surface display systems by gold binding peptide**

*R. eutropha* strains were induced to express gold binding peptides. The induced cells were incubated with freshly prepared Au nanoparticles solution for 2 h at 28°C. The

cell pellets were collected by centrifugation (12,225 g, 1 min) and washed three times with PBS buffer. The cells were dropped on the copper grid and stained with 2% phosphotungstic acid for 10 seconds for TEM analysis.

### **Biosynthesis of Au and Pt nanoparticles**

The strains were diluted and induced to express the metal binding peptides. The  $\text{HAuCl}_4 \cdot 3\text{H}_2\text{O}$  (Acros organics) or  $\text{H}_2\text{PtCl}_6 \cdot \text{H}_2\text{O}$  (Acros organics) solution was then added into the culture (final concentration: 1 mM), and incubated for 1 h. The cell pellets were collected by centrifugation (12,225 g, 1 min) and resuspended in PBS buffer. The sample was dropped on the copper grid for TEM analysis. *E. coli* and *R. eutropha* cells were incubated for 18 h and 26 h in M9 and H3 media for UV-vis spectrum analyses. Energy dispersive spectroscopy (EDS) was used to identify the elemental composition of samples. To get the sample for SEM/EDS analysis, the aforementioned cells with nanoparticles were lyophilized by VirTis Freeze Dryer 5SL. EDS was analyzed by using JEOL JSM-7600F Field Emission Scanning Electron Microscope with INCA X-Max EDS.

### **Reduction of 4-nitroaniline to 4-aminoaniline**

The cell pellets with metal NPs were collected by centrifugation (4,293 g, 1 min), and washed three times with distilled deionized water (DDW). The cells binding Au or Pt nanoparticles on the surface were used as catalysts for the reduction of 4-nitroaniline by  $\text{NaBH}_4$ . 100  $\mu\text{L}$  mixtures of methanol and DDW (1:1) containing 0.012 mg of 4-nitroaniline (final concentration: 0.9 mM), 0.78 mg cell pellets (wet weight), and 0.34 mg  $\text{NaBH}_4$  (final concentration: 90 mM) were analyzed. Absorption spectra were measured by UV-vis spectrophotometer (Hewlett-Packard, 8453) and Multi-Mode Microplate Reader. Kinetic analyses were generated by measuring the decrease of absorbance at 385 nm.

**Table S1 Bacterial strains used in this study**

| Strains                       | Relevant genotype                                                          | Construction and source                         |
|-------------------------------|----------------------------------------------------------------------------|-------------------------------------------------|
| <i>Ralstonia eutropha</i> H16 | Wild type                                                                  | DSM 428                                         |
| pYCY_281                      | <i>R. eutropha</i><br><i>pBAD-rfp bbr</i>                                  | pYCY_037 conjugated into <i>R. eutropha</i> H16 |
| pYCY_052                      | <i>R. eutropha</i><br><i>pBAD-rfp-gbp bbr</i>                              | pYCY_038 conjugated into <i>R. eutropha</i> H16 |
| pYCY_067                      | <i>R. eutropha</i><br><i>pBAD-fhuA-gbp bbr</i>                             | pYCY_063 conjugated into <i>R. eutropha</i> H16 |
| pYCY_107                      | <i>R. eutropha</i><br><i>pBAD-fhuA-rfp bbr</i>                             | pYCY_027 conjugated into <i>R. eutropha</i> H16 |
| pYCY_051                      | <i>R. eutropha</i><br><i>pBAD-fhuA-rfp-gbp bbr</i>                         | pYCY_039 conjugated into <i>R. eutropha</i> H16 |
| pYCY_060                      | <i>R. eutropha</i><br><i>pBAD-ompA-gbp bbr</i>                             | pYCY_049 conjugated into <i>R. eutropha</i> H16 |
| pYCY_080                      | <i>R. eutropha</i><br><i>pBAD-ompA-rfp bbr</i>                             | pYCY_082 conjugated into <i>R. eutropha</i> H16 |
| pYCY_079                      | <i>R. eutropha</i><br><i>pBAD-ompA-rfp-gbp bbr</i>                         | pYCY_081 conjugated into <i>R. eutropha</i> H16 |
| pYCY_068                      | <i>R. eutropha</i><br><i>pBAD-ss'-rfp-igA bbr</i>                          | pYCY_007 conjugated into <i>R. eutropha</i> H16 |
| pYCY_073                      | <i>R. eutropha</i><br><i>pBAD-ss'-gbp-igA bbr</i>                          | pYCY_071 conjugated into <i>R. eutropha</i> H16 |
| pYCY_303                      | <i>R. eutropha</i><br><i>pBAD-ss-lpp-ompA<sub>46-159</sub>-rfp bbr</i>     | pYCY_294 conjugated into <i>R. eutropha</i> H16 |
| pYCY_315                      | <i>R. eutropha</i><br><i>pBAD-ss'-gbp-rfp-igA bbr</i>                      | pYCY_297 conjugated into <i>R. eutropha</i> H16 |
| pYCY_323                      | <i>R. eutropha</i><br><i>pBAD-ss-lpp-ompA<sub>46-159</sub>-rfp-gbp bbr</i> | pYCY_319 conjugated into <i>R. eutropha</i> H16 |
| pYCY_324                      | <i>R. eutropha</i><br><i>pBAD-ss-lpp-ompA<sub>46-159</sub> bbr</i>         | pYCY_316 conjugated into <i>R. eutropha</i> H16 |
| pYCY_360                      | <i>R. eutropha</i><br><i>pBAD-ss-lpp-ompA<sub>46-159</sub>-gbp bbr</i>     | pYCY_320 conjugated into <i>R. eutropha</i> H16 |
| pYCY_399                      | <i>R. eutropha</i><br><i>pBAD-ss'-s7-igA bbr</i>                           | pYCY_393 conjugated into <i>R. eutropha</i> H16 |

**Table S1 (continued)**

| Strains                                      | Relevant genotype                                                  | Construction and source                                 |
|----------------------------------------------|--------------------------------------------------------------------|---------------------------------------------------------|
| <b><i>E. coli</i> DH5<math>\alpha</math></b> |                                                                    |                                                         |
| <b>pYCY_038</b>                              | <i>E. coli</i><br><i>pBAD-rfp-gbp bbr</i>                          | pYCY_038 transformed into <i>E. coli</i> DH5 $\alpha$ . |
| <b>pYCY_039</b>                              | <i>E. coli</i><br><i>pBAD-fhuA-rfp-gbp bbr</i>                     | pYCY_039 transformed into <i>E. coli</i> DH5 $\alpha$ . |
| <b>pYCY_082</b>                              | <i>E. coli</i><br><i>pBAD-ompA-rfp bbr</i>                         | pYCY_082 transformed into <i>E. coli</i> DH5 $\alpha$ . |
| <b>pYCY_081</b>                              | <i>E. coli</i><br><i>pBAD-ompA-rfp-gbp bbr</i>                     | pYCY_081 transformed into <i>E. coli</i> DH5 $\alpha$ . |
| <b>pYCY_294</b>                              | <i>E. coli</i><br><i>pBAD-ss-lpp-ompA<sub>46-159</sub>-rfp bbr</i> | pYCY_294 transformed into <i>E. coli</i> DH5 $\alpha$ . |
| <b>pYCY_297</b>                              | <i>E. coli</i><br><i>pBAD-ss'-gbp-rfp-igA bbr</i>                  | pYCY_297 transformed into <i>E. coli</i> DH5 $\alpha$ . |
| <b>pYCY_393</b>                              | <i>E. coli</i><br><i>pBAD-ss'-s7-igA bbr</i>                       | pYCY_393 transformed into <i>E. coli</i> DH5 $\alpha$ . |

**Table S2 Plasmids used in this study**

| Plasmids          | Relevant genotype                                                | Construction and source                                                                                                                                                 |
|-------------------|------------------------------------------------------------------|-------------------------------------------------------------------------------------------------------------------------------------------------------------------------|
| <b>pYCY_037</b>   | pBBRMCS plasmid with<br><i>pBAD-rfp, Kan<sup>R</sup></i>         |                                                                                                                                                                         |
| <b>pBbE5k-rfp</b> |                                                                  | Lee TS et al., 2011 <sup>3</sup>                                                                                                                                        |
| <b>pYCY_004</b>   | pBBRMCS plasmid with<br><i>pTrc-ss'-gbp-igA, Kan<sup>R</sup></i> |                                                                                                                                                                         |
| <b>pYCY_033</b>   | pBbE5K plasmid with<br><i>rfp-gbp, Kan<sup>R</sup></i>           | PCR fragments were amplified with primers 11 and 12, using pYCY_037 as a template. The PCR products were treated with NdeI and BamHI, and cloned into plasmid pYCY_020. |
| <b>pYCY_038</b>   | pBBRMCS plasmid with<br><i>pBAD-rfp-gbp, Kan<sup>R</sup></i>     | <i>rfp-gbp</i> fragments were treated with EcoRI and BamHI from pYCY_033, and cloned into plasmid                                                                       |

|                 |                                                                | pYCY_037.                                                                                                                                                                                    |
|-----------------|----------------------------------------------------------------|----------------------------------------------------------------------------------------------------------------------------------------------------------------------------------------------|
| Plasmids        | Relevant genotype                                              | Construction and source                                                                                                                                                                      |
| <b>pYCY_013</b> | pBBRMCS plasmid with <i>pBAD-fhuA, Kan<sup>R</sup></i>         | PCR fragments were amplified with primers 09 and 10, using pYCY_027 as a template. The PCR products were treated with EcoRI and XhoI, and cloned into plasmid pYCY_037.                      |
| <b>pYCY_063</b> | pBBRMCS plasmid with <i>pBAD-fhuA-gbp, Kan<sup>R</sup></i>     | <i>gbp</i> fragments were amplified with primers 35 and 36 by annealing. The <i>gbp</i> fragments were treated with NdeI and BamHI, and cloned into plasmid pYCY_027.                        |
| <b>pYCY_027</b> | pBBRMCS plasmid with <i>pBAD-fhuA-rfp, Kan<sup>R</sup></i>     | Yeh YC et al 2013 <sup>4</sup>                                                                                                                                                               |
| <b>pYCY_039</b> | pBBRMCS plasmid with <i>pBAD-fhuA-rfp-gbp, Kan<sup>R</sup></i> | PCR fragments were amplified with primers 11 and 12, using pYCY_037 as a template. The PCR products were treated with NdeI and BamHI, and cloned into plasmid pYCY_027.                      |
| <b>pYCY_049</b> | pBBRMCS plasmid with <i>pBAD-ompA-gbp, Kan<sup>R</sup></i>     | <i>ompA</i> fragments were amplified with primers 23 and 24, using <i>E. coli</i> colony as a template. The PCR products were treated with NdeI and BamHI, and cloned into plasmid pYCY_037. |

| <b>Plasmids</b> | <b>Relevant genotype</b>                                                           | <b>Construction and source</b>                                                                                                                                            |
|-----------------|------------------------------------------------------------------------------------|---------------------------------------------------------------------------------------------------------------------------------------------------------------------------|
| <b>pYCY_082</b> | pBBRMCS plasmid with <i>pBAD-ompA-rfp, Kan<sup>R</sup></i>                         | PCR fragments were amplified with primers 41 and 42, using pYCY_049 as a template. The PCR products were treated with NdeI and BglII, and cloned into plasmid pYCY_037.   |
| <b>pYCY_081</b> | pBBRMCS plasmid with <i>pBAD-ompA-gbp-rfp, Kan<sup>R</sup></i>                     | PCR fragments were amplified with primers 40 and 42, using pYCY_049 as a template. The PCR products were treated with NdeI and BglII, and cloned into plasmid pYCY_037.   |
| <b>pYCY_007</b> | pBBRMCS plasmid with <i>pBAD-ss'- rfp-igA , Kan<sup>R</sup></i>                    |                                                                                                                                                                           |
| <b>pYCY_071</b> | pBBRMCS plasmid with <i>pBAD-ss'-gbp-igA ,Kan<sup>R</sup></i>                      | <i>pBAD</i> fragments were treated with PstI and EcoRI from pYCY_037, and cloned into plasmid pYCY_004.                                                                   |
| <b>pYCY_292</b> | pBBRMCS plasmid with <i>pBAD-ompA<sub>46-159</sub>-rfp, Kan<sup>R</sup></i>        | PCR fragments were amplified with primers 165 and 166, using pYCY_049 as a template. The PCR products were treated with BglII and XhoI, and cloned into plasmid pYCY_037. |
| <b>pYCY_294</b> | pBBRMCS plasmid with <i>pBAD-ss-lpp-ompA<sub>46-159</sub>-rfp, Kan<sup>R</sup></i> | <i>ss-lpp</i> fragments were amplified with primers 167, 168, 169 and 170 by annealing. The <i>ss-lpp</i> fragments were treated                                          |

with NdeI and BamHI, and cloned into plasmid pYCY\_292.

| Plasmids        | Relevant genotype                                                                              | Construction and source                                                                                                                                                                  |
|-----------------|------------------------------------------------------------------------------------------------|------------------------------------------------------------------------------------------------------------------------------------------------------------------------------------------|
| <b>pYCY_297</b> | pBBRMCS plasmid with <i>pBAD-ss'-gfp-rfp-iga</i> , <i>Kan<sup>R</sup></i>                      | <i>ss'-gfp</i> fragments were amplified with primers 171, 172, 173 and 174 by annealing. The <i>ss'-gfp</i> fragments were treated with NdeI and SmaI, and cloned into plasmid pYCY_007. |
| <b>pYCY_316</b> | pBBRMCS plasmid with <i>pBAD-ss-lpp-ompA<sub>46-159</sub></i> , <i>Kan<sup>R</sup></i>         | PCR fragments were amplified with primers 180 and 166, using pYCY_294 as a template. The PCR products were treated with BglII and XhoI, and cloned into plasmid pYCY_037.                |
| <b>pYCY_319</b> | pBBRMCS plasmid with <i>pBAD-ss-lpp-ompA<sub>46-159</sub>-rfp-gfp</i> , <i>Kan<sup>R</sup></i> | PCR fragments were amplified with primers 222 and 223, using pYCY_294 as a template. The PCR products were treated with EcoRI and BamHI, and cloned into plasmid pYCY_037.               |
| <b>pYCY_320</b> | pBBRMCS plasmid with <i>pBAD-ss-lpp-ompA<sub>46-159</sub>-gfp</i> , <i>Kan<sup>R</sup></i>     | PCR fragments were amplified with primers 222 and 224, using pYCY_294 as a template. The PCR products were treated with EcoRI and BamHI, and cloned into plasmid pYCY_037.               |



| Plasmids        | Relevant genotype                                                    | Construction and source                                                                                                                                                 |
|-----------------|----------------------------------------------------------------------|-------------------------------------------------------------------------------------------------------------------------------------------------------------------------|
| <b>pYCY_393</b> | pBBRMCS plasmid with <i>pBAD-ss'-s7-iga</i> , <i>Kan<sup>R</sup></i> | PCR fragments were amplified with primers 4 and 273, using pYCY_071 as a template. The PCR products were treated with SmaI and BamHI, and cloned into plasmid pYCY_071. |

**Table S3 Primers used in this study**

| Primers                          | Sequence                                                           |
|----------------------------------|--------------------------------------------------------------------|
| 004_biobrick rv                  | cgttttatgtgatgctggagatcc                                           |
| 009_fhuA EcoRI fw                | tttgaattcaaaagatctagatctttaagaaggagatataatggc                      |
| 010_fhuA XhoI rv                 | tttctcgagtcaagagtccggagaagagccagaaacgaagcggaa                      |
| 011_rfp NdeI fw                  | tttcatatggcagtagcgaagacgttatcaaaga                                 |
| 012_rfp-gbp BamHI rv             | tttggatccttaagagtccggagaagagccagaaacagcaccggtgga                   |
| 023_ompA NdeI fw                 | tttcatatgaaaaagacagctatcgcgattgcagt                                |
| 024_ompA159 gbp<br>SmaI BamHI rv | ggatccttaagagtccggagaagagccagaaacccggggtgtccggac<br>g              |
| 035_gbp oligo NdeI/BamHI         | tatggtttctggcttcttccggactcttaag                                    |
| 036_gbp oligo com<br>NdeI/BamHI  | gatccttaagagtccggagaagagccagaaacca                                 |
| 040_ompA-gbp rfp NdeI rv         | tttcatatgagagtccggagaagagccagaa                                    |
| 041_ompA-rfp NdeI rv             | tttcatatggttgtccggacgagtgccgatg                                    |
| 042_ompA-gbp-rfp BglII<br>fw     | ttttagatctttaagaaggagatataatgaaaaagacagctatcgcgattg                |
| 111_s7 oligo NdeI/XhoI           | tatgtcgtcctttccgcagccgaactaac                                      |
| 112_s7 oligo NdeI/XhoI           | tcgagttagttcggctcggaaaggacgaca                                     |
| 165_ompA(46-159)BglII<br>fw      | ttttagatctttaagaaggagatataagcttagcttagaaacccgtatgttgctt<br>tgaaatg |
| 166_ompA(46-159)XhoI rv          | tttctcgaggttgcggacgagtgccg                                         |
| 167_ss-lpp oligo                 | ctagcatgaaagctactaaactggactgggctgggtaactcctgggttctact              |

| NheI/BamHI 5'-1       |                                                       |
|-----------------------|-------------------------------------------------------|
| 168_ss-lpp oligo      | ctgctggcaggttgctccagcaacgctaaaatcgatcagt              |
| NheI/BamHI 5'-2       |                                                       |
| Primers               | Sequence                                              |
| 169_ss-lpp oligo      | ctagactgatcgattttagcgttgctggagcaacctgccagcagagtagaacc |
| NheI/BamHI 3'-1       |                                                       |
| 170_ss-lpp oligo      | caggattaccgcgccagctaccagtttagtagctttcatg              |
| NdeI/BamHI 3'-2       |                                                       |
| 171_ss'-gbp oligo     | tatgaaatacctgctgccgaccgctgctgctggctctgctcctcgctgcc    |
| NdeI/SmaI 5'-1        | a                                                     |
| 172_ss'-gbp oligo     | gccggcgatggccgtttctggctcttctccggactctccc              |
| NdeI/SmaI 5'-2        |                                                       |
| 173_ss'-gbp oligo     | gggagagtccggagaagagccagaaacggccatcgccggctgggcagc      |
| NdeI/SmaI 3'-1        | gagg                                                  |
| 174_ss'-gbp oligo     | agcagcagaccagcagcagcggctcggcagcaggtatttca             |
| NdeI/SmaI 3'-2        |                                                       |
| 180_ss-lpp BglII fw   | ttttagatctttaagaaggagatatacatatgaaagctactaaactggactgg |
|                       | gc                                                    |
| 222_ss-lpp EcoRI fw   | tttgaattctttaagaaggagatatacatatgaaagctactaaactggactgg |
|                       | gc                                                    |
| 223_rfp-gbp BamHI rv  | ttttggatccttaagagtccggagaagagccagaaacagcaccgggtggagt  |
|                       | gacgac                                                |
| 224_ompA-gbp BamHI rv | ttttggatccttaagagtccggagaagagccagaaacggttgcggacgagt   |
|                       | gccgat                                                |
| 237_ompA BamHI rv     | ttttggatccttaccggggttgcggac                           |
| 273_s7 SmaI fw        | ttttccgggtcgtctttccgcagccgaacggttctggttctaccatggggag  |

**Table S4 The number of gold-nanoparticles labeling observed on cell surface**

|                             | FhuA-GBP | OmpA-GBP | ss-Lpp-<br>OmpA <sub>46~159</sub> -GBP | ss'-GBP-IgA |
|-----------------------------|----------|----------|----------------------------------------|-------------|
| Number of particle per cell | 35±9     | 35±20    | 27±6                                   | 57±16       |

n=20

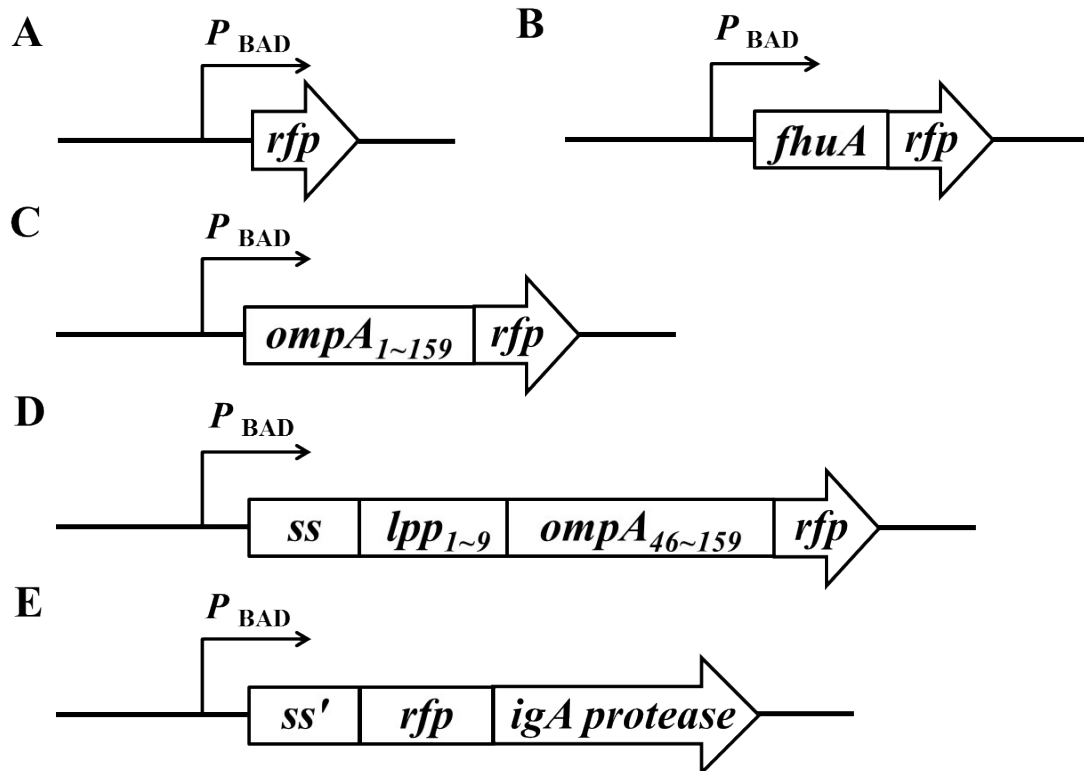

**Figure S1** Schematic representation of the constructs used in this work. The arabinose-inducible (A) RFP only, (B) FhuA-RFP, (C) OmpA<sub>1~159</sub>-RFP, (D) ss (signal-sequence of Lpp)-Lpp-OmpA<sub>46~159</sub>-RFP, and (E) ss' (signal-sequence of pelB)-RFP-IgA expression.

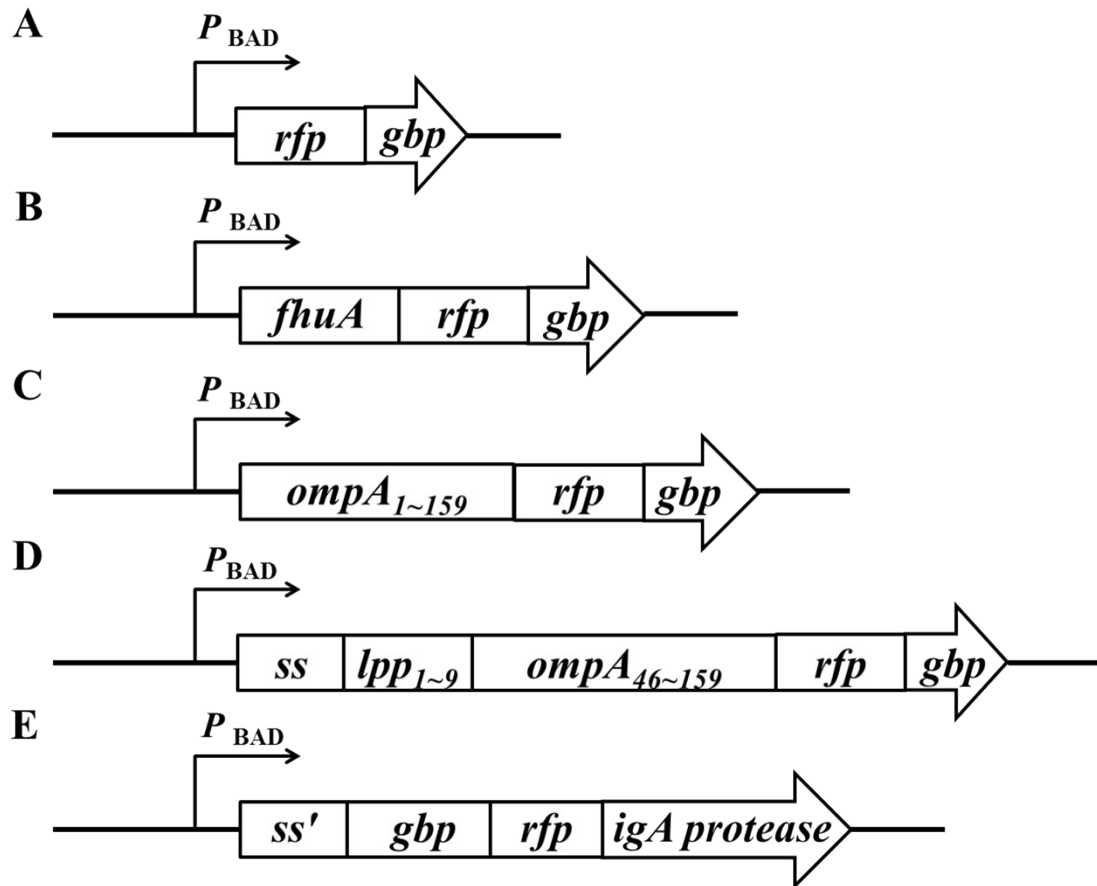

**Figure S2** Schematic representation of the constructs used in this study. The gold-binding-peptide (GBP) is fused with surface-display-carrier-RFP.

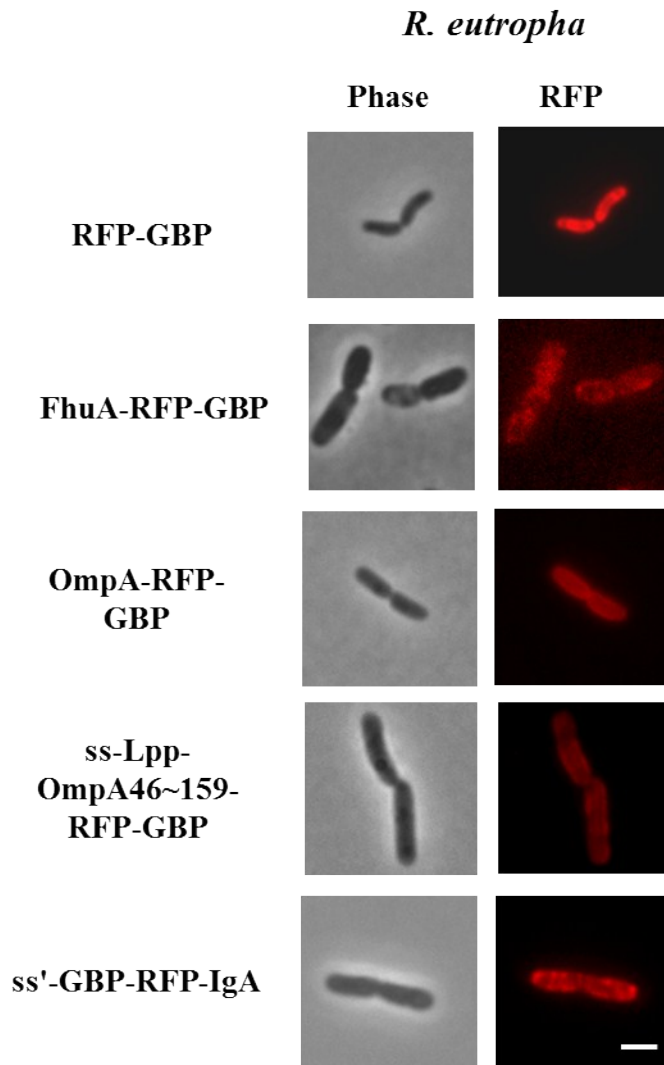

**Figure S3** Fluorescence micrograph of *R. eutropha* expressing RFP-GBP and surface display carrier-RFP-GBP (Scale bar: 2  $\mu$ m).

**A**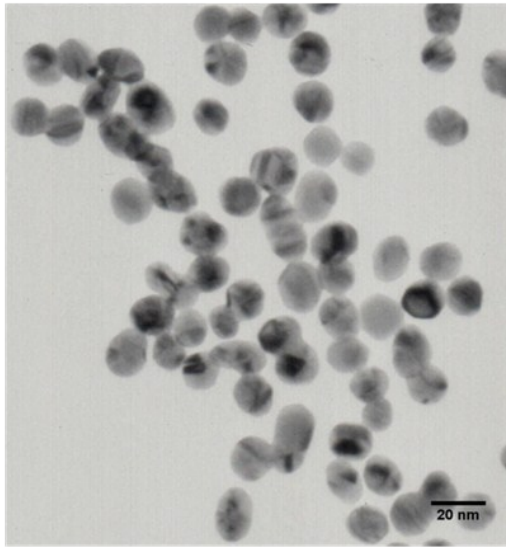**B**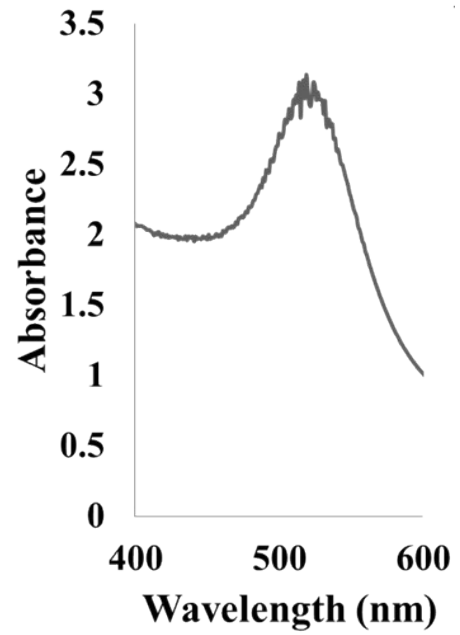

**Figure S4** Characterization of Au nanoparticles synthesized for GBP labeling. (A) TEM image of Au nanoparticles, and (B) UV/Vis spectrum.

*E. coli*

*R. eutropha*

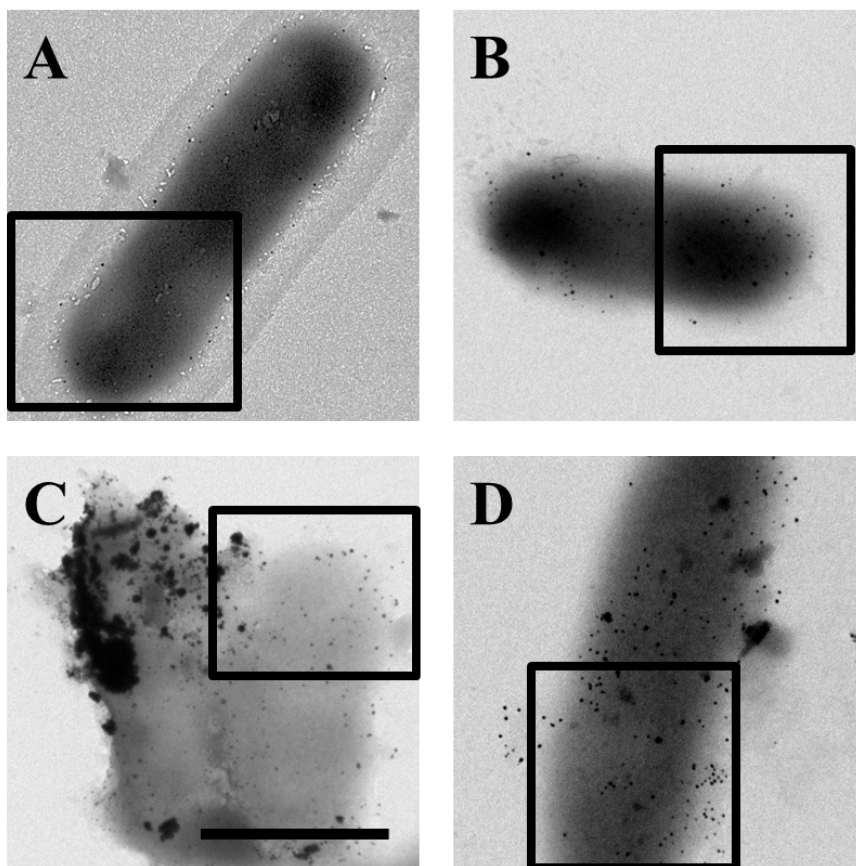

**Figure S5** The representative TEM images at a lower magnification of the *E. coli* and *R. eutropha* cells displaying (A)(B) Au and (C)(D) Pt NPs (Scale bar: 1 μm).

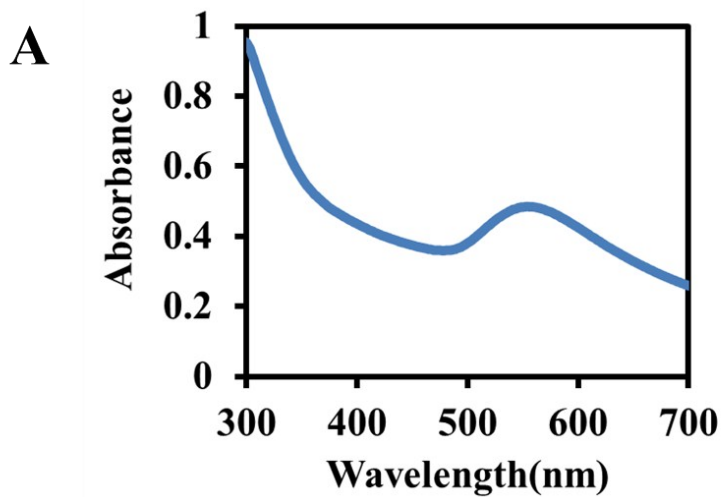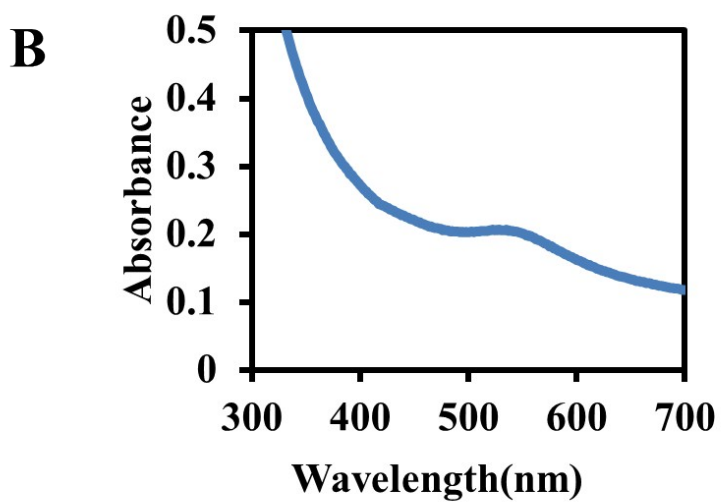

**Figure S6** UV-vis spectra of the gold NPs synthesized by (A) *E. coli* (B) *R. eutropha* expressing GBP-IgA.



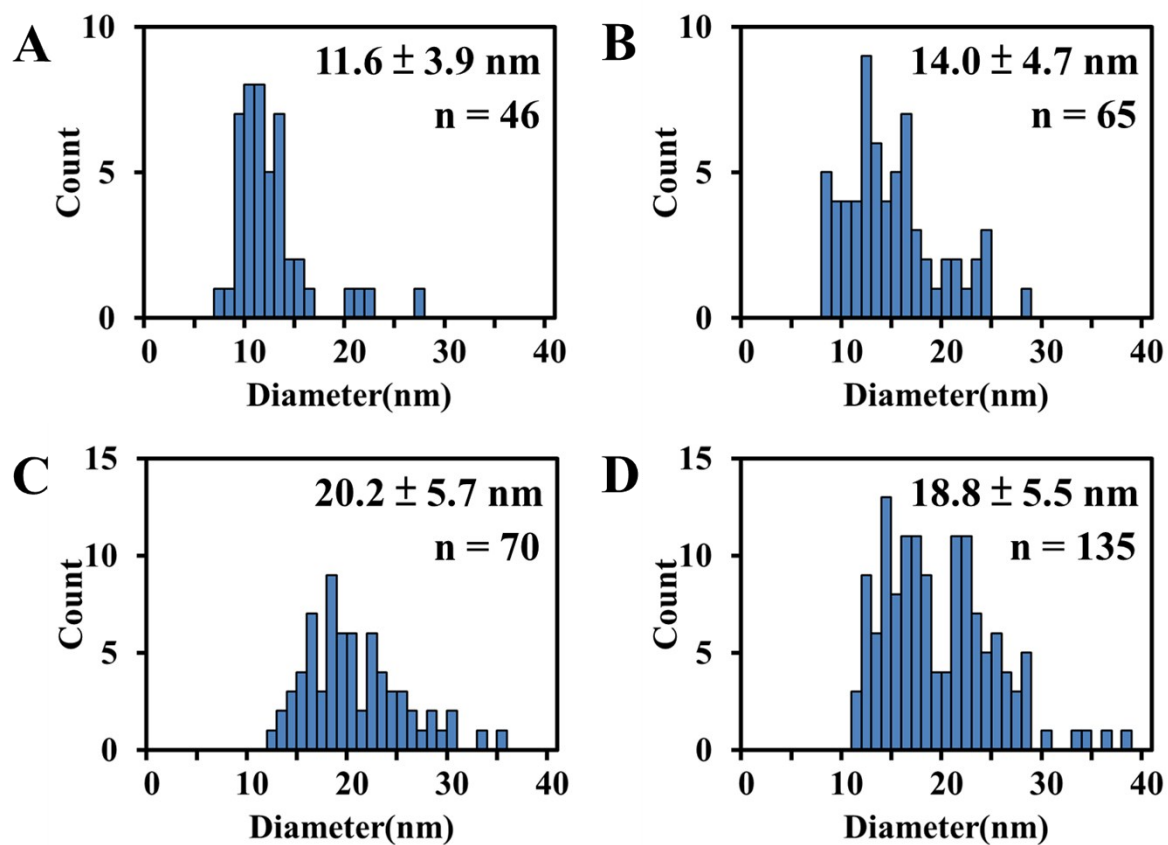

**Figure S7** Histograms of size distribution analysis of Au and Pt NPs from (A) Figure 3A, (B) Figure 3B, (C) Figure 3C, and (D) Figure 3D.

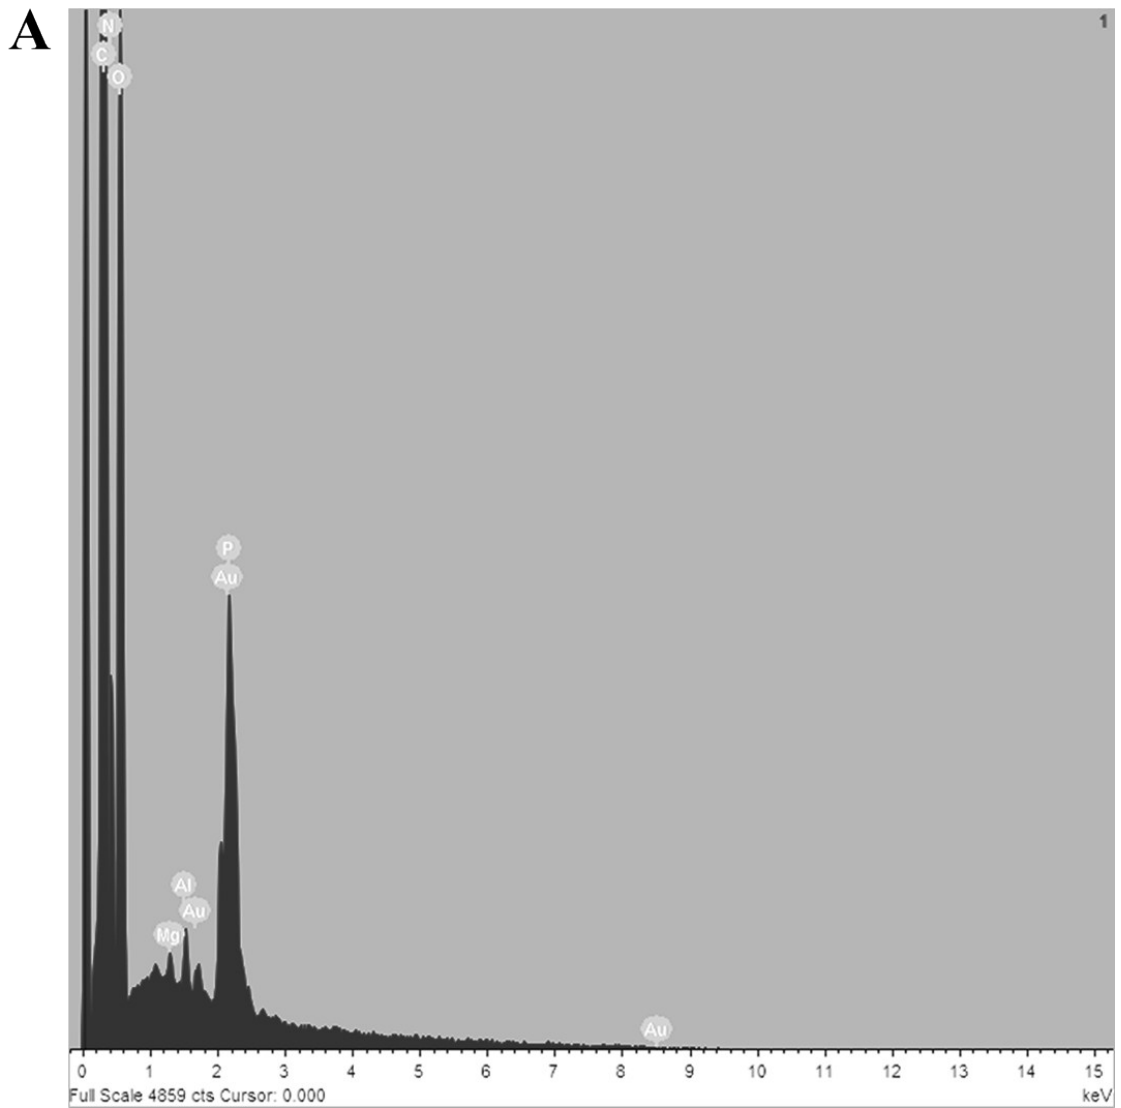

**Figure S8** EDS analysis of Au (A and B) and Pt (C and D) nanoparticles synthesized by a recombinant strain of (A, C) *E. coli* and (B, D) *R. eutropha*.

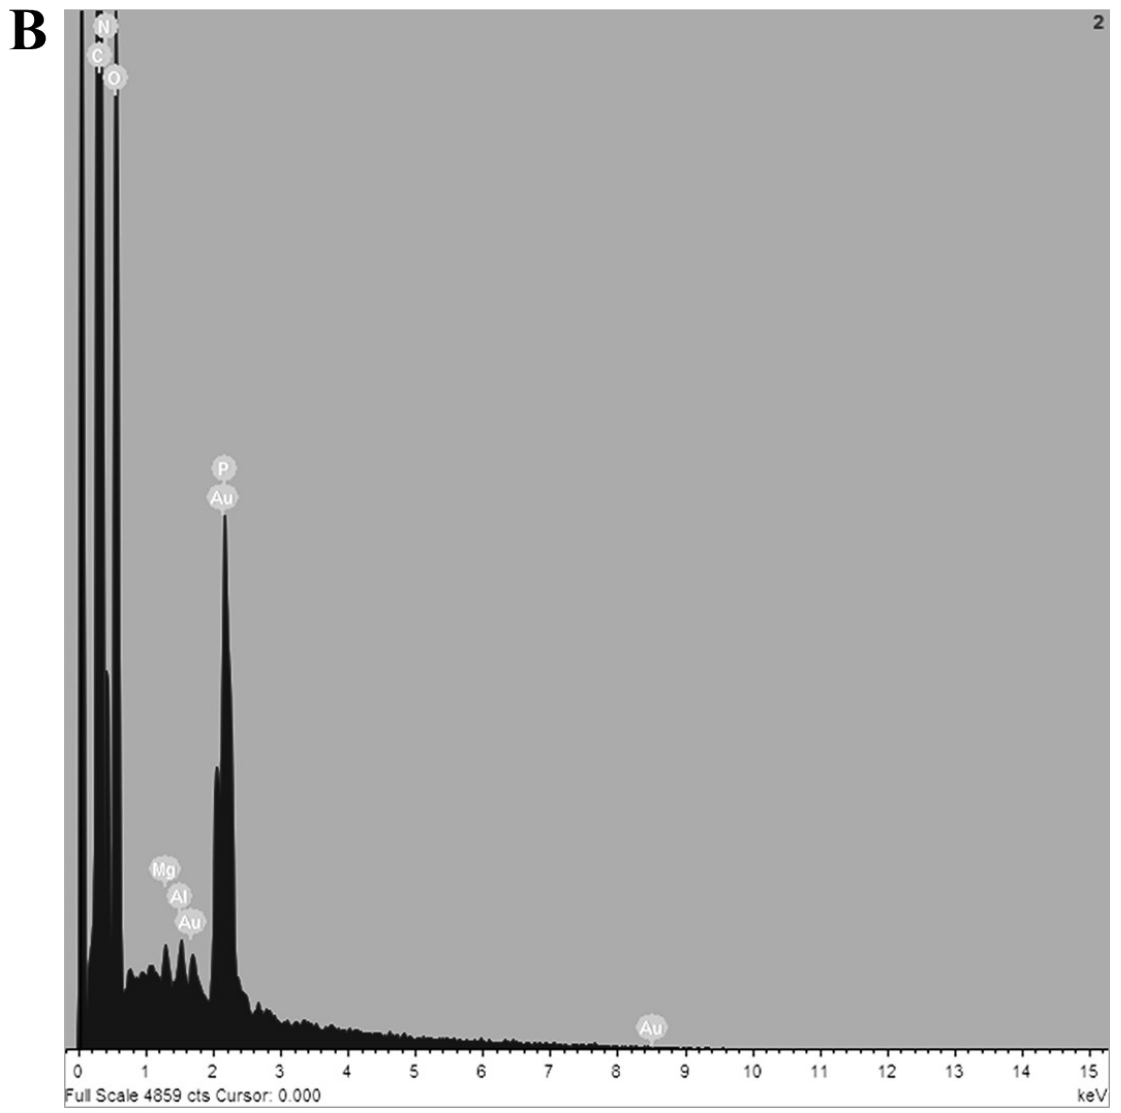

**Figure S8 (continued)**

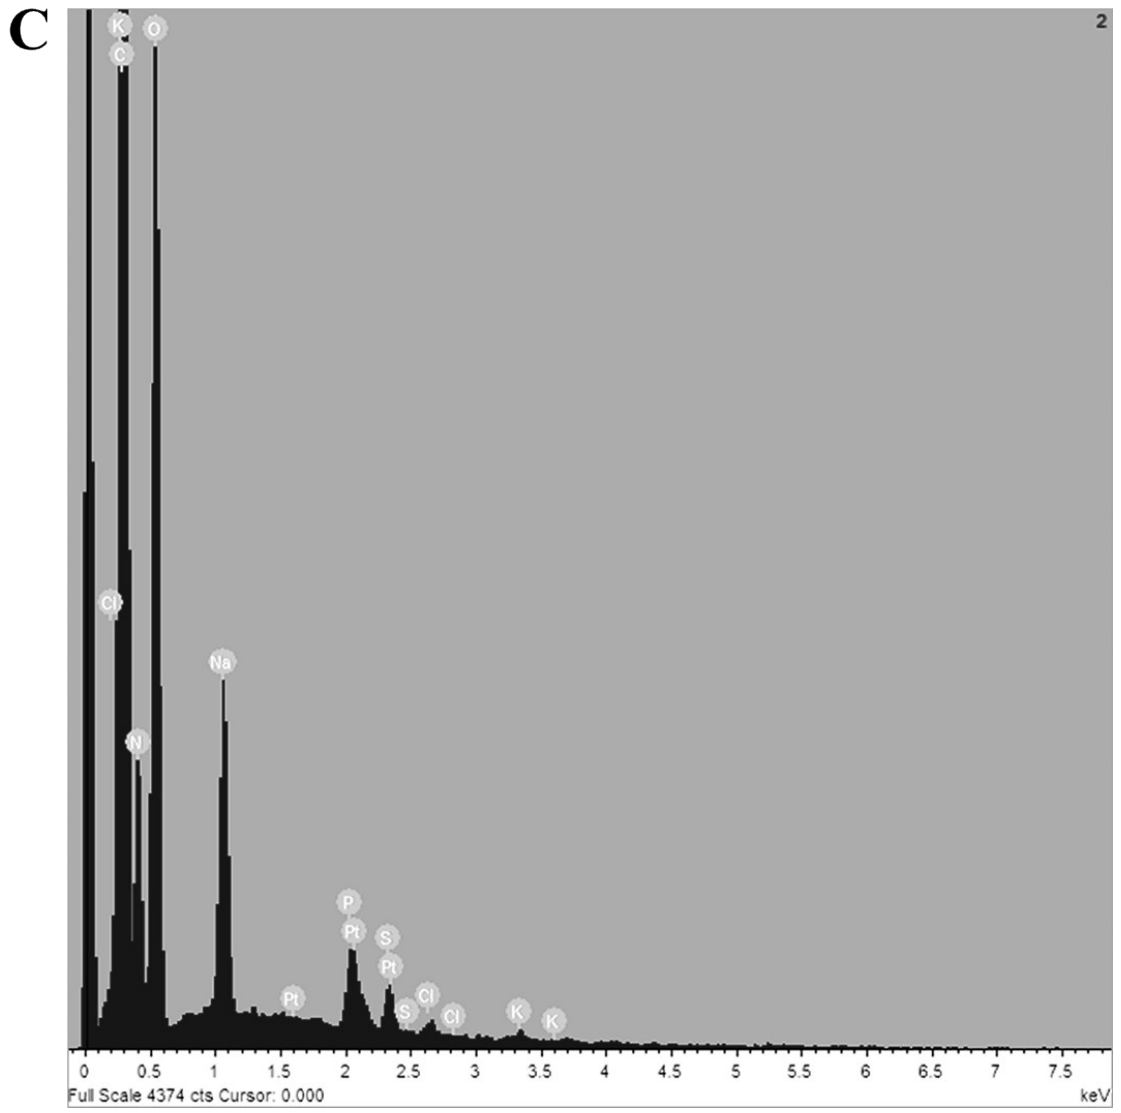

**Figure S8 (continued)**

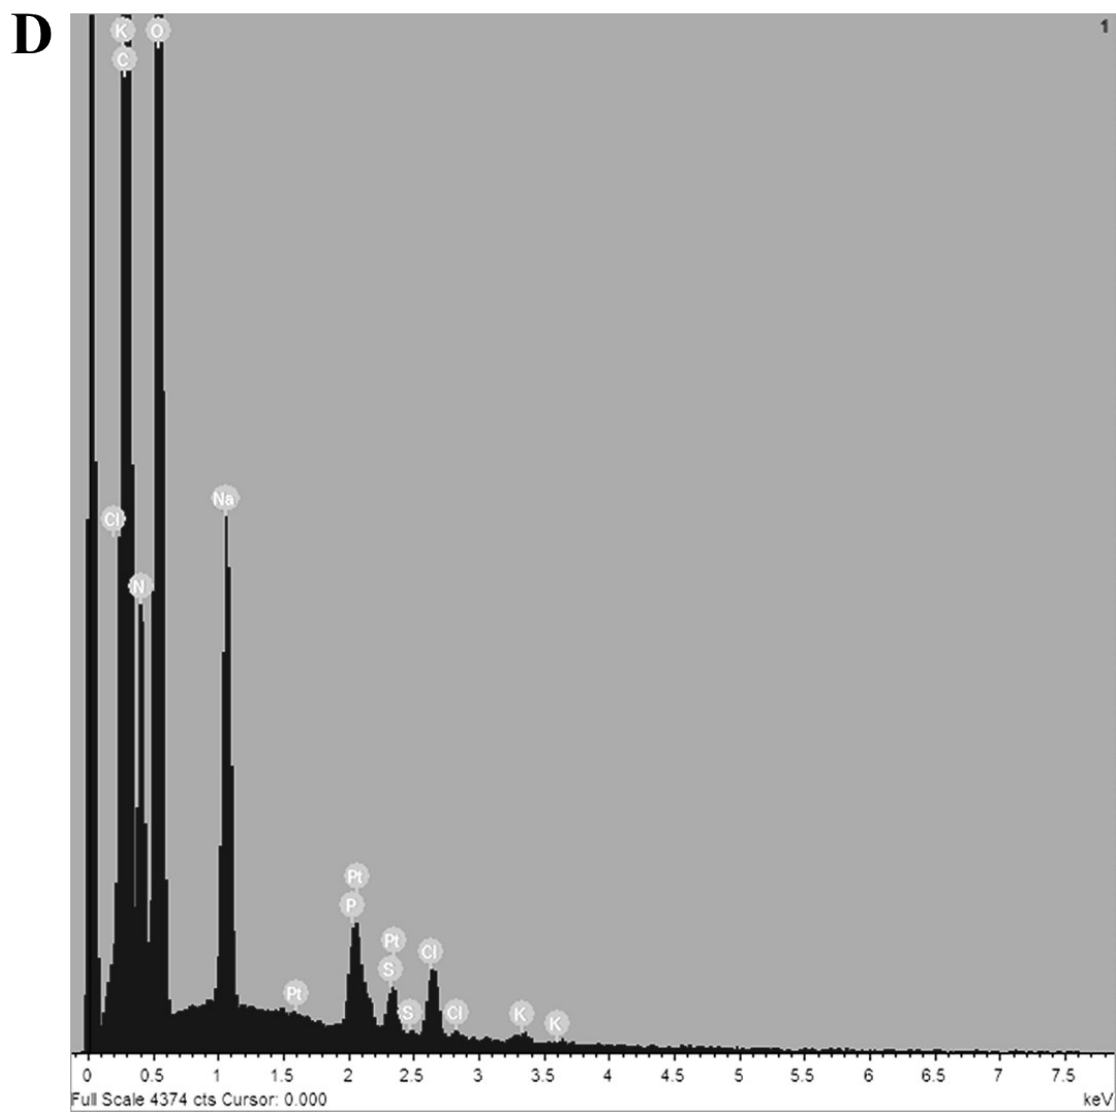

**Figure S8 (continued)**

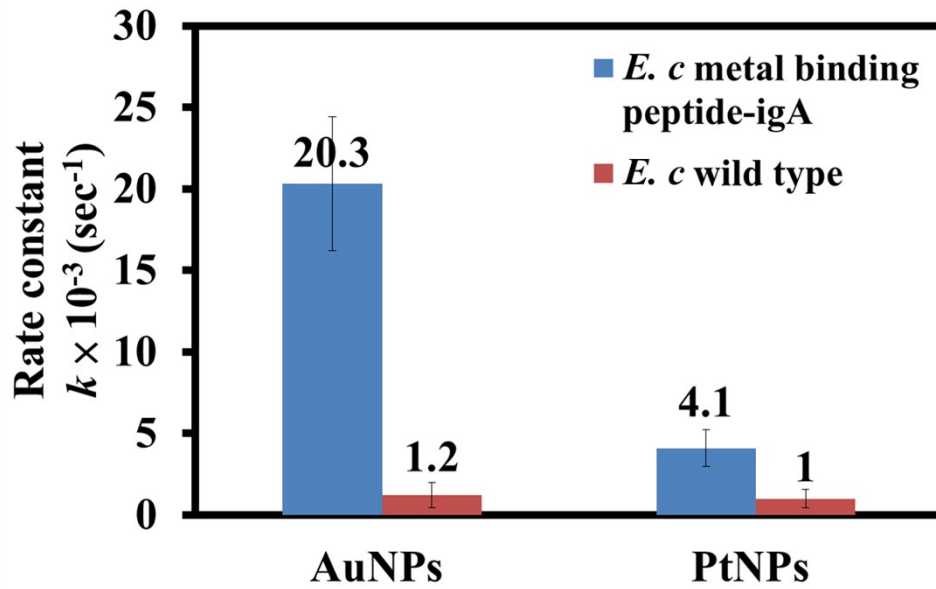

**Figure S9** The comparison of rate constants for the reduction of 4-nitroaniline by wild type *E. coli* and metal binding peptide-IgA cells anaerobically treated with 1mM of  $\text{Au}^{3+}/\text{Pt}^{4+}$ .

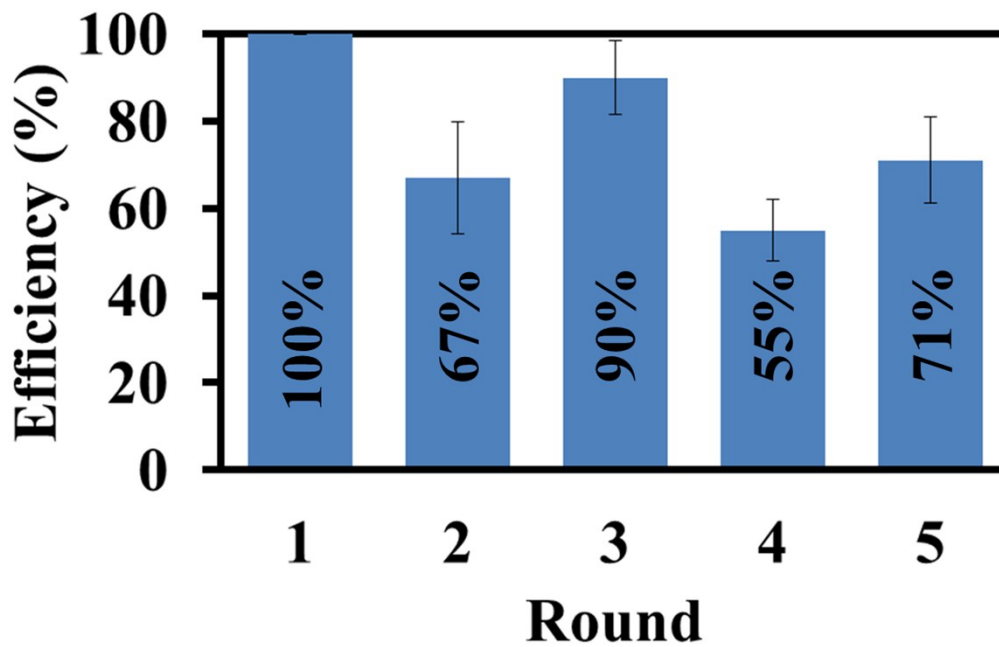

**Figure S10** The rate constants of the *E. coli* AuNP whole-cell biocatalyst for the reduction of 4-nitroaniline for five rounds of reuse (efficiency is relative to the rate constant of the first round).

Fi

## References:

1. G. Frens, *Nature Physical Science*, 1973, 241, 20-22.
2. J.-W. Jian and C.-C. Huang, *Chemistry – A European Journal*, 2011, 17, 2374-2380.
3. T. S. Lee, R. A. Krupa, F. Zhang, M. Hajimorad, W. J. Holtz, N. Prasad, S. K. Lee and J. D. Keasling, *Journal of biological engineering*, 2011, 5, 12.
4. Y.-C. Yeh, J. Muller, C. Bi, N. J. Hillson, H. R. Beller, S. R. Chhabra and S. W. Singer, *Chemical Communications*, 2013, 49, 910-912.
